# Supplementary material for: Analysis of SDHAF3 in familial and sporadic pheochromocytoma and paraganglioma
Source: Springer Nature journal article supplement (doi:10.1186/s12885-017-3486-z), 2017-07-24
Supplement: MOESM1 [file 13323964]

**Table S2.** Summary of *SDHAF3* c.157T>C (p.Phe53Leu) variant analysis in pheochromocytoma and/or paraganglioma of suspected sporadic origin

| Tumour ID | Tumor Type               | Primary Germline Mutation | Somatic <i>SDHAF3</i> c.157T>C Status | Germline <i>SDHAF3</i> c.157T>C Status | SDHB IHC              |
|-----------|--------------------------|---------------------------|---------------------------------------|----------------------------------------|-----------------------|
| 1         | PC (benign, 23 years)    | none known <sup>a</sup>   | WT                                    | nd                                     | positive <sup>b</sup> |
| 2         | PC (benign, 45years)     | none known <sup>a</sup>   | c.157T>C (heterozygous)               | c.157T>C (heterozygous)                | na                    |
| 3         | PC (benign, 47 years)    | none known <sup>a</sup>   | WT                                    | nd                                     | positive <sup>b</sup> |
| 4         | PC (benign, 67 years)    | none known <sup>a</sup>   | WT                                    | nd                                     | na                    |
| 5         | PC (benign, 58 years)    | none known <sup>a</sup>   | c.157T>C (heterozygous)               | c.157T>C (heterozygous)                | na                    |
| 6         | PC (benign, 75 years)    | none known <sup>a</sup>   | WT                                    | nd                                     | na                    |
| 7         | PC (benign, 68 years)    | none known <sup>a</sup>   | WT                                    | nd                                     | positive <sup>b</sup> |
| 8         | PC (benign, 64 years)    | none known <sup>a</sup>   | WT                                    | nd                                     | positive <sup>b</sup> |
| 9         | PC (benign, 47 years)    | none known <sup>a</sup>   | c.157T>C (heterozygous)               | c.157T>C (heterozygous)                | positive <sup>b</sup> |
| 10        | PC (benign, 67 years)    | none known <sup>a</sup>   | WT                                    | nd                                     | positive <sup>b</sup> |
| 11        | PGL (benign, 36 years)   | none known <sup>a</sup>   | WT                                    | nd                                     | positive <sup>b</sup> |
| 12        | PC (malignant, 56 years) | none known <sup>a</sup>   | WT                                    | nd                                     | positive <sup>b</sup> |
| 13        | PC (malignant, 52 years) | none known <sup>a</sup>   | WT                                    | nd                                     | positive <sup>b</sup> |
| 14        | PC (malignant, 49 years) | none known <sup>a</sup>   | WT                                    | nd                                     | na                    |
| 15        | PC (malignant, 37 years) | none known <sup>a</sup>   | WT                                    | nd                                     | na                    |

Abbreviations: IHC - immunohistochemistry; na - not available; nd - not done; PC - pheochromocytoma; PGL - paraganglioma (extra adrenal thoracic/abdominal); WT - wild-type

<sup>a</sup> Germline tests included *SDHB* (all exons), *SDHD* (all exons), *RET* (exon 11 only), and *VHL* (all exons), and were performed using PCR and denaturing high performance liquid chromatography (dHPLC) as previously described (Meyer-Rochow et al., 2010).

<sup>b</sup> SDHB IHC performed on whole section at the time of diagnosis and/or tissue microarray.
