# Supplementary material for: Analysis of SDHAF3 in familial and sporadic pheochromocytoma and paraganglioma
Source: Springer Nature journal article supplement (doi:10.1186/s12885-017-3486-z), 2017-07-24
Supplement: MOESM2 [file 13323964]

**Table S1.** Summary of *SDHAF3* c.157T>C (p.Phe53Leu) variant analysis in familial SDH-associated individuals

| Family ID | Individual ID | Tumor Details    | Primary Germline Mutation     | Somatic <i>SDHB</i> Mutation/Allele Status | Germline <i>SDHAF3</i> c.157T>C Status | Somatic <i>SDHAF3</i> c.157T>C/Allele Status |
|-----------|---------------|------------------|-------------------------------|--------------------------------------------|----------------------------------------|----------------------------------------------|
| S11       | 1             | PC (metastatic)  | SDHB (splice-site)            | IVS3 + loss normal allele                  | c.157T>C                               | c.157T>C + retention normal allele           |
| S50       | 1             | PGL              | SDHB (nonsense)               | nd                                         | WT                                     | nd                                           |
| S15       | 1             | PC (metastatic)  | SDHB (splice-site)            | nd                                         | WT                                     | nd                                           |
| S18       | 1             | PGL              | SDHB (frameshift)             | nd                                         | WT                                     | nd                                           |
| S24       | 1             | PGL              | SDHB (splice-site)            | nd                                         | WT                                     | nd                                           |
| S26       | 1             | PGL              | SDHB (missense)               | nd                                         | WT                                     | nd                                           |
| S27       | 1             | PGL              | SDHB (frameshift)             | nd                                         | WT                                     | nd                                           |
| S52       | 1             | HN PGL           | SDHB (nonsense)               | nd                                         | WT                                     | nd                                           |
| S55       | 1             | HN PGL           | SDHB (frameshift)             | nd                                         | c.157T>C                               | nd                                           |
| S59       | 1             | HN PGL           | SDHB (nonsense)               | nd                                         | WT                                     | nd                                           |
| S25       | 1             | HN PGL           | SDHB (missense)               | nd                                         | WT                                     | nd                                           |
| S10       | 1             | PGL (metastatic) | SDHB (missense + splice-site) | nd                                         | WT                                     | nd                                           |
| S16       | 1             | PGL (metastatic) | SDHB (splice-site)            | nd                                         | WT                                     | nd                                           |
| S20       | 1             | PC               | SDHB (splice-site)            | nd                                         | WT                                     | nd                                           |
| S37       | 1             | PC (metastatic)  | SDHB (splice-site)            | nd                                         | WT                                     | nd                                           |
| S44       | 1             | PC (metastatic)  | SDHB (frameshift)             | nd                                         | WT                                     | nd                                           |
| S69       | 1             | PGL              | SDHC (nonsense)               | nd                                         | WT                                     | nd                                           |
| S82       | 1             | HN PGL           | SDHD (missense)               | nd                                         | WT                                     | nd                                           |
| S83       | 1             | PGL              | SDHD (missense)               | nd                                         | WT                                     | nd                                           |
| S84       | 1             | HN PGL           | SDHD (frameshift)             | nd                                         | WT                                     | nd                                           |
| S88       | 1             | HN PGL           | SDHD (frameshift)             | nd                                         | WT                                     | nd                                           |
| S93       | 1             | PC + HN PGL      | SDHD (nonsense)               | nd                                         | WT                                     | nd                                           |
| S105      | 1             | HN PGL           | SDHA (missense)               | nd                                         | WT                                     | nd                                           |

Abbreviations: IVS - intervening sequence; nd - not done; PC - pheochromocytoma; PGL - paraganglioma (extra adrenal thoracic/abdominal); HNPGL (head and neck paraganglioma); WT - wild-type
