# Supplementary material for: Analysis of SDHAF3 in familial and sporadic pheochromocytoma and paraganglioma
Source: Springer Nature journal article supplement (doi:10.1186/s12885-017-3486-z), 2017-07-24
Supplement: MOESM3 [file 13323964]

**Table S3.** Summary of *SDHAF3* c.157T>C (p.Phe53Leu) variant analysis in Family S11

| Family ID | Individual ID | Tumor Details                        | Primary Germline Mutation | Somatic <i>SDHB</i> Mutation/Allele Status | Germline <i>SDHAF3</i> c.157T>C Status | Somatic <i>SDHAF3</i> c.157T>C/Allele Status |
|-----------|---------------|--------------------------------------|---------------------------|--------------------------------------------|----------------------------------------|----------------------------------------------|
| S11       | 1             | PC (18 years) (metastatic, 24 years) | SDHB (IVS3)               | IVS3 + loss normal allele                  | c.157T>C (heterozygous)                | c.157T>C + retention normal allele           |
|           | 2             | PC (metastatic, 59 years)            | SDHB (IVS3)               | IVS3 + loss normal allele                  | c.157T>C (heterozygous)                | na                                           |
|           | 3             | PGL (30 years)                       | SDHB (IVS3)               | nd                                         | c.157T>C (heterozygous)                | nd                                           |
|           | 4             | PGL (11 years)                       | SDHB (IVS3)               | IVS3 + loss normal allele                  | WT                                     | WT                                           |
|           | 5             | PGL (34 years)                       | SDHB (IVS3)               | nd                                         | WT                                     | nd                                           |
|           | 6             | No evidence of PC/PGL (66 years)     | SDHB (IVS3)               | nd                                         | c.157T>C (heterozygous)                | nd                                           |
|           | 7             | No evidence of PC/PGL (22 years)     | SDHB (IVS3)               | nd                                         | c.157T>C (heterozygous)                | nd                                           |
|           | 8             | No evidence of PC/PGL (62 years)     | SDHB (IVS3)               | nd                                         | c.157T>C (heterozygous)                | nd                                           |
|           | 9             | No evidence of PC/PGL (57 years)     | SDHB (IVS3)               | nd                                         | c.157T>C (heterozygous)                | nd                                           |
|           | 10            | No evidence of PC/PGL (35 years)     | SDHB (IVS3)               | nd                                         | WT                                     | nd                                           |
|           | 11            | No evidence of PC/PGL (34 years)     | SDHB (IVS3)               | nd                                         | WT                                     | nd                                           |
|           | 12            | No evidence of PC/PGL (29 years)     | SDHB (IVS3)               | nd                                         | WT                                     | nd                                           |
|           | 13            | No evidence of PC/PGL (26 years)     | SDHB (IVS3)               | nd                                         | WT                                     | nd                                           |
|           | 14            | No evidence of PC/PGL (23 years)     | SDHB (IVS3)               | nd                                         | WT                                     | nd                                           |
|           | 15            | No evidence of PC/PGL (66 years)     | SDHB (IVS3)               | nd                                         | WT                                     | nd                                           |

Abbreviations: IVS - intervening sequence; na - not able to amplify; nd - not done; PC - pheochromocytoma; PGL - paraganglioma (extra adrenal thoracic/abdominal); WT - wild-type
